# Supplementary material for: Using citizen science to protect threatened amphibian populations in Mediterranean urban spaces
Source: Research Square preprint supplement (doi:10.21203/rs.3.rs-4193518/v1), 2024-05-21
Supplement: Supplementary file 1 [file cda9d7f694d3972cb6299ab0.xlsx]

## Sheet: Full surveys Gazelle Valley
date	starting time	duration	survey type	air temp. C	tot. Bufotes variabilis	tot. Hyla savignyi	tot. Pelophylax bedriagae	General notes:	B. variabilis in terrestrial activity	H. savignyi in terrestrial activity	P. bedriagae in terrestrial activity	Notes:	B. variabilis in marine activity	H. savignyi in marine activity	P. bedriagae in marine activity	Notes:	B. variabilis tadpoles seen (yes/no)	H. savignyi tadpoles seen (yes/no)	P. bedriagae tadpoles seen (yes/no)	Notes:	pond 1 surveyed (no/ from shore/ with net)	water temp. C- pond 1	B. variabilis calls- pond 1	H. savignyi calls- pond 1	P. bedriagae calls- pond 1	B. variabilis in marine activity- pond 1	H. savignyi in marine activity- pond 1	P. bedriagae in marine activity- pond 1	B. variabilis tadpoles seen (yes/no)- pond 1	H. savignyi tadpoles seen (yes/no)- pond 1	P. bedriagae tadpoles seen (yes/no)- pond 1	Notes:	pond 2 surveyed (no/ from shore/ with net)	water temp. C - pond 2	B. variabilis calls - pond 2	H. savignyi calls - pond 2	P. bedriagae calls - pond 2	B. variabilis in marine activity - pond 2	H. savignyi in marine activity - pond 2	P. bedriagae in marine activity - pond 2	B. variabilis tadpoles seen (yes/no) - pond 2	H. savignyi tadpoles seen (yes/no) - pond 2	P. bedriagae tadpoles seen (yes/no) - pond 2	Notes:	pond 3 surveyed (no/ from shore/ with net)	water temp. C - pond 3	B. variabilis calls - pond 3	H. savignyi calls - pond 3	P. bedriagae calls - pond 3
2020-08-25			survey. Nightime. Terrestrial		0	0			0	0											no												no												no
2020-08-31	20:00:00		survey. Nightime. Terrestrial		0	1			0	1											no												no												no
2020-10-20	18:40:00	2h 40 min	survey. Nightime. Terrestrial		6	0	417	during the first rain of that year. כל צפרדעי הנחלים מלבד 2-3 היו צעירות באורך של פחות מ4-5 ס"מ.	6	0	417										no												no												no
2020-11-05	17:40:00	40 min	survey. Nightime. Terrestrial	15	0	0	29	גשם באותו יום	0	0	29										no												no												no
2020-11-12	19:00:00	30 min	survey. Nightime. Terrestrial		0	1	5	גשם באותו יום	0	0	5										no												no												no
2020-11-14	17:20:00	30 min	survey. Nightime. Terrestrial		1	0	12	הגשם הראשון באותו יום התחיל בזמן הסקר	1	0	12										no												no												no
2020-12-14	21:00:00	45 min	survey. Nightime. Terrestrial		2	0	7	גשם בינוני התחיל שעתיים לפני תחילת הסקר	2	0	7										no												no												no
2021-01-14	18:40:00	54 min	survey. Nightime. Terrestrial		9	0	2	גשם חזק תהחיל כמה שעות לפני הסיור אחרי תקופה יבשה של כמה שבועות. גשם לאורך מרבית הסיור. שטפון חזק בנחלי העמק. נאלצתי לעבור את נחל רקפת מדרום לסכר של בריכה 5. מרבית הקרפדות היו חלקים הגבוהים ביותר. אורן חשד שזה בגלל הקרה בעמק. אני סקפטי כי ביום גשום עם רוחות לא אמורה להיווצר קרה משמעותית	9	0	2										no												no												no
2021-02-02	00:45:00	40 min	casual. Nightime. Terrestrial+shore		0	5+	1	אורן עשה, מאוחר בלילה, עם פנס גרוע, נשמעו אילניות בבריכת חורף. תחילת עונת החיזור, ואיתה תחילת סקרי החיזור מהחוף במהלך הסקרים הליליים, והסקרים במקווי המים	0	0	1		0	5+			no	no	no		from shore		0	0	0	0	0	0	no	no	no		from shore		0	0	0	0	0	0	no	no	no		from shore		0	0	0
2021-02-08	18:30:00	35 min	survey. Nightime. Terrestrial+shore	12	1	15+	0	נשמעו אילניות וקרפדה, הטמפ' בחלק הגבוה בצפון 16 מעלות. נצפו גמבוזיות בשטחי ההצפה, בברכית החורף לא נצפו גמבוזיות ונצפו זחלי יתושים אדומים רבים	0	0	0		1	15+			no	no	no		from shore		0	1+	0	0	0	0	no	no	no		from shore		0	8+	0	0	0	0	no	no	no	המון גמבוזיות. 12 מעלות אוויר	from shore		0	0	0
2021-02-25			survey.Daytime. Marine			1+	1+	הסקר בוצע במים עם הנפות רשת, 10 הנפות של 5 שניות במים ב3 דרגות עומק שונות (עד 30 ס"מ עומק, 30-60 ומעל 60) עם רשת אקווריומים					0	1+	1+		no	no	no		with net		0	0	0	0	0	0	no	no	no		with net	11	0	1	0	0	0	0	no	no	no	temp. was 16 C in shallow water	with net	9	0	0	1+
2021-03-01	19:20:00	28 min	survey. Nightime. Terrestrial+shore	8	0	12+	1+	נשמעו אילניות וצפרדעי נחלים, טמפ' זהה בחלק העליון של הפארק	0	0	0		0	12+	1+		no	no	no		from shore	9	0	1	0	0	0	0	no	no	no		from shore		0	1	0	0	0	0	no	no	no		from shore	8	0	1	1+
2021-03-22	20:40:00	32 min	survey. Nightime. Terrestrial+shore	16	0	5+	3	נשמעו אילניות וצפרדעים. Moisture 63%. השמענו צלילי חיזור של קרפדות ואילניות	0	0	3		0	5+	1+		no	no	no		from shore		0	1+	0	0	0	0	no	no	no		from shore		0	1+	0	0	0	0	no	no	no		from shore	6	0	0	0
2021-03-30			survey.Daytime. Marine					הסקר בוצע במים עם הנפות רשת, 10 הנפות של 5 שניות במים ב3 דרגות עומק שונות (עד 30 ס"מ עומק, 30-60 ומעל 60) עם רשת אקווריומים					0	0	0		yes	no	no		with net		0	0	0	0	0	0	no	no	no		with net		0	0	0	0	0	0	no	no	no		with net		0	0	0
2021-05-19		45 min	survey. Nightime. Terrestrial+shore	19	0	5+	0	Moisture 61%	0	0	0		0	5+			no	no	no		from shore		0	1+	0	0	0	0	no	no	no		from shore		0	1+	0	0	0	0	no	no	no		from shore		0	1+	0
[truncated: 45 more columns]

## Sheet: Full surveys in Hemmed
date	duration	survey type	air temp. C	tot. Bufotes variabilis	tot. Hyla savignyi	tot. Pelophylax bedriagae	General notes:	B. variabilis in terrestrial activity	H. savignyi in terrestrial activity	P. bedriagae in terrestrial activity	Notes:	B. variabilis in marine activity	H. savignyi in marine activity	P. bedriagae in marine activity	Notes:	B. variabilis tadpoles seen (yes/no)	H. savignyi tadpoles seen (yes/no)	P. bedriagae tadpoles seen (yes/no)	Notes:	pond 1 + 2 surveyed (no/ from shore/ with net)	water temp. C- pond 1 + 2	B. variabilis calls- pond 1 + 2	H. savignyi calls- pond 1 + 2	P. bedriagae calls- pond 1 + 2	B. variabilis in marine activity- pond 1 + 2	H. savignyi in marine activity- pond 1 + 2	P. bedriagae in marine activity- pond 1 + 2	B. variabilis tadpoles seen (yes/no)- pond 1 + 2	H. savignyi tadpoles seen (yes/no)- pond 1 + 2	P. bedriagae tadpoles seen (yes/no)- pond 1 + 2	Notes:	pond 3 surveyed (no/ from shore/ with net)	water temp. C - pond 3	B. variabilis calls - pond 3	H. savignyi calls - pond 3	P. bedriagae calls - pond 3	B. variabilis in marine activity - pond 3	H. savignyi in marine activity - pond 3	P. bedriagae in marine activity - pond 3	B. variabilis tadpoles seen (yes/no) - pond 3	H. savignyi tadpoles seen (yes/no) - pond 3	P. bedriagae tadpoles seen (yes/no)	Notes:	pond 4 surveyed (yes/ from shore/ with net)	water temp. C - pond 4	B. variabilis calls	H. savignyi calls - pond 4	P. bedriagae calls - pond 4	B. variabilis in marine activity - pond 4
03.09.2019		casual		10+			חיפוש קרפדות של אורן עם ילדיו, ראה עשרות פרטים בכל הגדלים	10+
12.12.2020		survey. Nightime. Terrestrial		0	0	0	שני סוקרים. סקר ראשון, נעשה בשעה מאוחרת (22:30), חוסר פעילות מיוחס לקור, נצפתה קרפדה לפני הסקר במרחק 100 מטרים מהכניסה לגן הלאומי	0	0	0										no												no												no
21.12.2020	1h20min	survey. Nightime. Terrestrial		4	0	0	שני סוקרים. חצינו את הכביש, הלוך חזור למערת קבורה ושביל נוסף, 3 נקבות וזכר אחד	4	0	0										no												no												no
05.01.2021	1h25min	survey. Nightime. Terrestrial		4	0	0	שני סוקרים.מסלול מעגלי, רק ההלוך למערת הקבורה נרשם, סיור בחניוני אספלט, חצינו את הכביש, 2 זכרים ו2 נקבות קרפדה, ללא לכידות חוזרות.	4	0	0										no												no												no
02.02.2021	2h25min	survey. Nightime. Terrestrial+shore	13.5	23	0	0	שני סוקרים. כל הפרטים מלבד אחד נצפו במים. מלבד הפרטים שצולמו נצפו עוד שני זוגות בהזדווגות. מלבדם רק נקבה אחת. בתשעה הראשונים לא נבדקה יבלת רגל, בחאירם נבדקה, ורק פרט אחד זוהה כנקבה. הסיבוב הרגלי היה ספורדי יחסית אבל כלל הרבה מאוד מהגן הלאומי, ורק פרט אחד נצפה בפעילות על היבשה. לא נצפו אילניות ולא נשמעו קולות, גם כשניסינו להשמיע להן קולות מוקלטים משך הסיור כולל את המים. טמפ קרקע 11.5.	1	0	0		22	0	0		no	no	no		from shore		0	0	0	0	0	0	no	no	no		from shore		1+	0	0	20	0	0	no	no	no	קביעת זוויג על סמך מראה- לא נבדקו יבלות רבייה. 14 זכרים, נקבה 1, שניז וגות בהזדווגות	from shore		0	0	0	0
10.02.2021	1h40min	survey. Nightime. Terrestrial+shore	11	55	0	0	, . שני סוקרים .טמפ קרקע 16 מעלות. 49 פרטים נצפו במים. בנק/ הכי נמוכה טמפ/ אוויר 9. שעה ו5 דקות מתוך משך הסיור בוצעו סביב מקווי המים נמצא שרוך ביצים ליד המים בבריכה 3	0	0	0		55	0	0		no	no	no		from shore	13	1+	0	0	5	0	0	no	no	no	אוויר - 10 מעלות	from shore		1+	0	0	40	0	0	no	no	no	31 זכרים צולמו, עוד 9 פרטים היו בהזדווגות או נסיון הזדווגות	from shore		0	0	0	1
02.03.2021	1h20min	survey. Nightime. Terrestrial+shore	10	9	0	0	שני סוקרים. נצפה תן. הטמפ' נמדדה בכמה נקודות. 49 דקות סביב מקווי המים	1	0	0		8	0	0		no	no	no		from shore	10.5	1+	0	0	4	0	0	yes	no	no	ראשנים מרובים. לכל הפרטים הייתה יבלת רבייה שחורה (=זכרים)	from shore	14	1+	0	0	2	0	0	yes	no	no	ראשנים מרובים. טמפ אווויר - 10 מעלות. לכל הפרטים הייתה יבלת רבייה שחורה (=זכרים)	from shore		0	0	0	1
23.03.2021	1h41 min	survey. Nightime. Terrestrial+shore	16	21	0	0	סוקר אחד. נצפה שועל. טמפ' רק בכניסה. נמדדה לחות. שעה ו12 דקות סביב מקווי המים. נצפתה קצרחפית	3	0	0		18	0	0		no	no	no		from shore		1+	0	0	13	0	0	yes	no	no	בריכה 1 ריקה ממים	from shore		1+	0	0	5	0	0	yes	no	no	4 זכרים ונקבה	from shore		0	0	0	1
20.04.2021	1h49min	survey. Nightime. Terrestrial+shore	19	11	0	0	סוקר אחד. שעה ותשע דקות סביב מקווי המים	2	0	0		9	0	0		no	no	no		from shore		1	0	0	4	0	0	no	no	no		from shore		0	0	0	0	0	0	yes	no	no		from shore		0	0	0	0
07.05.2021		casual. Nightime. Terrestrial+shore		1			באתי להניח מכשיר הקלטה ומצאתי מטמורף בבריכה 3													no												from shore											מטמורף בודד בפעילות על המסלע סמוך למים
22.05.2021	1h1min	survey. Nightime. Terrestrial+shore	18	11	0	0	27 סוקר אחד. דקות סביב מקווי המים	0	0	0		11	0	0		no	no			from shore		1+	0	0	1	0	0	no	no	no	מטמורף 1 בשביל מעל הבריכה	from shore		0	0	0	11	0	0	no	no	no	10 מטמורפים בפעילות במים הרדודים או בשלוליות לצד הבריכה ונקבה בוגרת אחת	from shore		0	0	0	0
04.07.2021		casual.daytime				1	תצפית אקראית של אורן בצפרדע נחלים בבריכה 4 . לא נצפו שום ראשני קרפדה																																					from shore
24.07.2021	15min	casual. Nightime. Terrestrial		6			זכרים - 1 נקבות - 0 צעירים - 5
30.08.2021	30 min	casual. Nightime. Terrestrial		5	0	0	3 בוגרות (קטנות יחסית), 2 צעירות (בנות חצי שנה עד שנה וחצי). כל ה-5 בצד של הנחל שבו נמצאת הכניסה והדשאים.	5	0	0		0	0	0						no												no												no
[truncated: 30 more columns]

## Sheet: B.f. capture list -gazelle val.
date	observation type	obserever	length (mm)	location	id	sex (by spot pattern)
2020-10-20	survey	Omer Darel	37.2	31.758160, 35.193764	GV001	F
2020-10-20	survey	Omer Darel	57.6	31.759628, 35.194254	GV002	M
2020-10-20	survey	Omer Darel	70.6	31.763213, 35.194172	GV003	F
2020-10-20	survey	Omer Darel	65.9	31.763213, 35.194172	GV004	F
2020-10-20	survey	Omer Darel	63.6	31.760753, 35.195769	GV005	F
2020-10-20	survey	Omer Darel	73.8	31.760514, 35.195844	GV006	F
2020-10-20	casual - by surveier	Omer Darel	57.3	31.759233, 35.197620	GV007	M
2020-10-20	casual - by surveier	Omer Darel	76.7	31.758900, 35.197443	GV008	F
2020-11-15	survey	Omer Darel	72	31.7615651,35.1941925	GV009	F
2020-12-14	survey	Omer Darel	72	31.7616750, 35.1943080	GV009	F
2020-12-14	survey	Omer Darel	76.3	31.7610270, 35.1957130	GV010	F
2021-01-14	survey	Omer Darel	64.6	31.7589477,35.1939891	GV003	F
2021-01-14	survey	Omer Darel	82.2	31.760813,35.1943385	GV011	F
2021-01-14	survey	Omer Darel	90	31.7610049,35.1942001	GV012	F
2021-01-14	survey	Omer Darel	81.7	31.7611595,35.1942139	GV013	M
2021-01-14	survey	Omer Darel	68.4	31.7614031,35.1940625	GV009	F
2021-01-14	survey	Omer Darel	82.7	31.7615301,35.194189	GV014	F
2021-01-14	survey	Omer Darel	76.3	31.7621912,35.1942885	GV015	F
2021-01-14	survey	Omer Darel	73.3	31.7629365,35.1950379	GV016	M
2021-01-14	survey	Omer Darel	65	31.7624266,35.1954681	GV017	F
2021-01-14	casual - by surveier	Omer Darel	81.7	31.758834, 35.197630	GV018	F

## Sheet: B.f. capture list -Ein Hemmed
date	observation type	obserever	length (mm)	location	id	sex (by spot pattern)	activity	comment
21.12.2020	survey	Omer Darel	75	31.799203, 35.127163	EH059	M	terrestrial
21.12.2020	survey	Omer Darel	77.8	31.798443, 35.126923	EH060	F	terrestrial
21.12.2020	survey	Omer Darel	92.1	31.7963059,35.1254408	EH061	F	terrestrial
21.12.2020	survey	Omer Darel	74.8	31.796113, 35.125134	EH037	F	terrestrial
05.01.2021	survey	Omer Darel	65.1	31.7967507,35.1256083	EH062	M	terrestrial
05.01.2021	survey	Omer Darel	76.9	31.7983706,35.1264375	EH063	F	terrestrial
05.01.2021	survey	Omer Darel	84.4	31.7989737,35.1275612	EH064	M	terrestrial
05.01.2021	survey	Omer Darel	88.3	31.7990701,35.1273731	EH065	F	terrestrial
01.02.2021	survey	Omer Darel	75.7	31.79726, 35.12557	EH001	M	marine	male wart found
01.02.2021	survey	Omer Darel	76.1	31.79726, 35.12557	EH002	M	marine	male wart found
01.02.2021	survey	Omer Darel	76.3	31.79726, 35.12557	EH003	M	marine	male wart found
01.02.2021	survey	Omer Darel	79.9	31.79726, 35.12557	EH004	M	marine	male wart found
01.02.2021	survey	Omer Darel	76.4	31.79726, 35.12557	EH005	M	marine	male wart found
01.02.2021	survey	Omer Darel	75.3	31.79726, 35.12557	EH006	M	marine
01.02.2021	survey	Omer Darel	79.6	31.79726, 35.12557	EH007	M	marine
01.02.2021	survey	Omer Darel	79.4	31.79726, 35.12557	EH008	M	marine
01.02.2021	survey	Omer Darel	86.4	31.79726, 35.12557	EH066	F	marine	male wart not found
01.02.2021	survey	Omer Darel	78	31.7962331,35.124953	EH067	M	terrestrial	about 20m from the water
01.02.2021	survey	Omer Darel	65.3	31.796855, 35.125429	EH068	M	marine	alone in the stream
01.02.2021	survey	Omer Darel	79.4	31.79726, 35.12557	EH069	M	marine
01.02.2021	survey	Omer Darel	78.1	31.79726, 35.12557	Non-distinct 1	M	marine
01.02.2021	survey	Omer Darel	82.1	31.79726, 35.12557	EH070	M	marine
01.02.2021	survey	Omer Darel	78.7	31.79726, 35.12557	EH048	M	marine
10.02.2021	survey	Omer Darel	82.2	31.79726, 35.12557	EH006	M	marine	male wart found
10.02.2021	survey	Omer Darel	82	31.79726, 35.12557	EH008	M	marine	male wart found
10.02.2021	survey	Omer Darel	79	31.7984757,35.1259974	EH009	M	marine
10.02.2021	survey	Omer Darel	76	31.7984757,35.1259974	EH010	M	marine
10.02.2021	survey	Omer Darel	83.4	31.7979712,35.125966	EH011	M	marine
10.02.2021	survey	Omer Darel	98.8	31.79726, 35.12557	EH012	M	marine
10.02.2021	survey	Omer Darel	84.1	31.79726, 35.12557	EH013	M	marine
10.02.2021	survey	Omer Darel	80.2	31.79726, 35.12557	EH014	M	marine
10.02.2021	survey	Omer Darel	75.5	31.79726, 35.12557	EH015	M	marine
10.02.2021	survey	Omer Darel	83.5	31.79726, 35.12557	EH071	M	marine	male wart found
10.02.2021	survey	Omer Darel	83.1	31.79726, 35.12557	EH016	M	marine	male wart found
10.02.2021	survey	Omer Darel	93.3	31.79726, 35.12557	EH017	M	marine	male wart found
10.02.2021	survey	Omer Darel	84	31.79726, 35.12557	EH018	M	marine	male wart found
10.02.2021	survey	Omer Darel	87.3	31.79726, 35.12557	EH019	M	marine	male wart found
10.02.2021	survey	Omer Darel	71.9	31.79726, 35.12557	EH020	M	marine	male wart found
10.02.2021	survey	Omer Darel	86.1	31.79726, 35.12557	EH021	M	marine	male wart found
10.02.2021	survey	Omer Darel	76.3	31.79726, 35.12557	EH022	M	marine	male wart found
10.02.2021	survey	Omer Darel	73	31.79726, 35.12557	EH023	M	marine	male wart found
10.02.2021	survey	Omer Darel	68.1	31.79726, 35.12557	EH072	M	marine	male wart found
10.02.2021	survey	Omer Darel	79.6	31.79726, 35.12557	EH024	M	marine	male wart found
10.02.2021	survey	Omer Darel	79.1	31.79726, 35.12557	EH025	M	marine	male wart found
10.02.2021	survey	Omer Darel	83.7	31.79726, 35.12557	EH073	M	marine	male wart found
10.02.2021	survey	Omer Darel	77.3	31.79726, 35.12557	EH026	M	marine	male wart found
10.02.2021	survey	Omer Darel	73.1	31.79726, 35.12557	EH074	M	marine	male wart found
10.02.2021	survey	Omer Darel	66.3	31.79726, 35.12557	EH027	M	marine	male wart found
10.02.2021	survey	Omer Darel	79	31.79726, 35.12557	EH075	M	marine	male wart found
10.02.2021	survey	Omer Darel	79.2	31.796855, 35.125429	Non-distinct 2	M	marine	male wart found
02.03.2021	survey	Omer Darel	78.9	31.7986614,35.1260257	EH028	M	marine	male wart found
02.03.2021	survey	Omer Darel	66.2	31.79726, 35.12557	EH057	M	marine	male wart found
02.03.2021	survey	Omer Darel	89.4	31.79726, 35.12557	EH029	M	marine	male wart found
02.03.2021	survey	Omer Darel	79.7	31.797019, 35.125474	EH030	M	marine	male wart found
02.03.2021	survey	Omer Darel	75.2	31.7962842,35.1250622	EH031	M	marine	male wart found
02.03.2021	survey	Omer Darel	92.3	31.7965821,35.1258001	EH032	M	terrestrial	male wart found
02.03.2021	survey	Omer Darel	77.8	31.7986614,35.1260257	EH033	M	marine	male wart found
02.03.2021	survey	Omer Darel	82.4	31.7986614,35.1260257	EH034	M	marine	male wart found
02.03.2021	survey	Omer Darel	68.7	31.7986614,35.1260257	EH035	M	marine	male wart found
22.03.2021	survey	Omer Darel	89.4	31.7968178,35.1259093	EH036	F	terrestrial	male wart not found
22.03.2021	survey	Omer Darel	75	31.7962973,35.1253951	EH037	F	terrestrial	male wart not found
22.03.2021	survey	Omer Darel	69.2	31.7947314,35.1236717	EH038	M	terrestrial
22.03.2021	survey	Omer Darel	77.5	31.796294,35.1252189	EH076	M	marine
22.03.2021	survey	Omer Darel	73.9	31.797045, 35.125559	EH039	M	marine
22.03.2021	survey	Omer Darel	86.8	31.797387, 35.125763	EH040	F	marine	male wart not found
22.03.2021	survey	Omer Darel	76	31.797387, 35.125763	EH041	M	marine
22.03.2021	survey	Omer Darel	83.8	31.797387, 35.125763	EH006	M	marine
22.03.2021	survey	Omer Darel	72.8	31.797387, 35.125763	EH042	M	marine
22.03.2021	survey	Omer Darel	82.4	31.7986614,35.1260257	EH044	M	marine
22.03.2021	survey	Omer Darel	82.1	31.7986614,35.1260257	EH045	M	marine
22.03.2021	survey	Omer Darel	84.1	31.7986614,35.1260257	Non-distinct 3	M	marine
22.03.2021	survey	Omer Darel	88.3	31.7986614,35.1260257	EH046	M	marine
22.03.2021	survey	Omer Darel	74.2	31.7986614,35.1260257	EH047	M	marine
22.03.2021	survey	Omer Darel	71.8	31.798593,35.1259514	EH048	M	marine
22.03.2021	survey	Omer Darel	95.5	31.798593,35.1259514	EH032	M	marine
22.03.2021	survey	Omer Darel	76	31.798593,35.1259514	EH049	M	marine
22.03.2021	survey	Omer Darel	79.9	31.798593,35.1259514	EH050	M	marine
20.04.2021	survey	Omer Darel	76.4	31.798873, 35.127735	EH051	F	terrestrial	male wart not found
20.04.2021	survey	Omer Darel	81	31.799053, 35.127367	EH052	F	terrestrial	male wart not found
20.04.2021	survey	Omer Darel	83.7	31.7985527,35.1260311	EH053	F	marine	male wart not found
20.04.2021	survey	Omer Darel	76.7	31.7985527,35.1260311	EH054	M	marine	residual male wart found
20.04.2021	survey	Omer Darel	75.7	31.7985527,35.1260311	EH057	M	marine	male wart found
20.04.2021	survey	Omer Darel	72.1	31.7970906,35.1259342	EH055	M	terrestrial	male wart found, the toad was sitting in a puddle
20.04.2021	survey	Omer Darel	71.3	31.7969292,35.1256589	EH056	M	marine
20.04.2021	survey	Omer Darel	74.4	31.7969292,35.1256589	EH058	M	marine

## Sheet: GV water fauna (hebrew)
תאריך	מיקום	עומק	גמבוזיות	ראשני קרפדה	ראשני אילנית	ראשני צפרדע נחלים	אחרים	ביצים	טמפ'	הערות
25.02.2021	אגם 1	30-	נצפו פרטים בודדים	0	0	0	2 זחלי ימשוש	0
25.02.2021	אגם1	30-60	נצפו פרטים בודדים	0	0	0	2 זחלי ימשוש	0
25.02.2021	אגם 1	60+	נצפו פרטים בודדים	0	0	0	4 זחלי ימשוש	0
25.02.2021	שטח הצפה	30-	נצפו פרטים מרובים	0	0	0		0	22	בחלק המוצף הרדוד מאוד ממערב לבריכת ההצפה
25.02.2021	שטח הצפה	30-60	נצפו פרטים מרובים	0	0	0	מאות דפניות, עשרות שטרגליים אדמדמים, צדפוניות בודדות	0		בבריכת ההצפה
25.02.2021	שטח הצפה	60+	נצפו פרטים מרובים	0	0	0	מאות דפניות, עשרות שטרגליים אדמדמים, צדפוניות בודדות, זחלים חומים לא מזוהים	0	13	בבריכת ההצפה
25.02.2021	בריכת חורף	30-	0	0	0	0	זחלים לא מזוהים	0
25.02.2021	בריכת חורף	30-60	0	0	0	0	דפניות, 7 זחלי ימשוש, שטרגליים אדמדמים, צדפוניות בודדות	0	20.5
25.02.2021	בריכה 3	30-	3	0	0	0	ימשוש, נימפה של שפרירית, זחל בריומאי ודבר מה נוסף, זחלים חומים	0
25.02.2021	בריכה 3	30-60	0	0	0	0	זחלים לא מזוהים, תולעים לא מזוהות	0	9	נשמעו קרקורים שלא זוהו
25.02.2021	בריכה 4	30-	34	0	0	0	שטגב, חיפושית מים	0	15
25.02.2021	בריכה 4	30-60	2	0	0	0	זחלי ימשושים	0
25.02.2021	בריכה 4	60+	0	0	0	0	7-8 זחלי ימשושים	0	11	נשמעו צפרדעי נחלים
25.02.2021	בריכה 2	30-	6	0	0	0	זחלי ימשושים, חותרן	0	16
25.02.2021	בריכה 2	30-60	0	0	0	0	זחלי ימשושים	0
25.02.2021	בריכה 2	60+	0	0	0	0		0	11	נשמעה אילנית
30.3.2021	אגם	-30	10	0	0	0	ימשוש			בריכת החורף ושטחי ההצפה יבשים. לא נמצאו ביצים באגם
30.3.2021	אגם	30-60	0	0	0	0	ימשוש, דפניה
30.3.2021	אגם	60+	0	0	0	0	ימשוש, דפניה
30.3.2021	בריכה 3	-30	3	0	0	0	זחל (טניפוס?), ימשושים			לא נמצאו ביצים
30.3.2021	בריכה 3	30-60	0	0	0	0	זחל (טניפוס?)
30.3.2021	בריכה 4	-30	15	10	0	0	זחל ציצני			לא נמצאו ביצים, נצפו בקרבת הגדה 435 ראשנים
30.3.2021	בריכה 4	30-60	1	0	0	0	דפניות, דבר מה לא מזוהה
30.3.2021	בריכה 4	60+	0	0	0	0	ימשוש, דפניה
30.3.2021	בריכה 2	-30	1	0	0	0	ימשוש, חותרן			לא נמצאו ביצים
30.3.2021	בריכה 2	30-60	1	0	0	0	ימשוש, חותרן
30.3.2021	בריכה 2	60+	0	0	0	0
